# Supplementary material for: Influx of African biomass burning aerosol during the Amazonian dry seasonthrough layered transatlantic transport of black carbon-rich smoke
Source: Copernicus journal article supplement (doi:10.5194/acp-2019-775), 2019-09-02
Supplement: Supplementary file 1 [file acp-2019-775-supplement.pdf]

*Supplement of*

**Influx of African biomass burning aerosol during the Amazonian dry season  
through layered transatlantic transport of black carbon-rich smoke**

Bruna A. Holanda et al.

\* *Correspondence to:* M. Pöhlker (m.pohlker@mpic.de) and C. Pöhlker (c.pohlker@mpic.de)

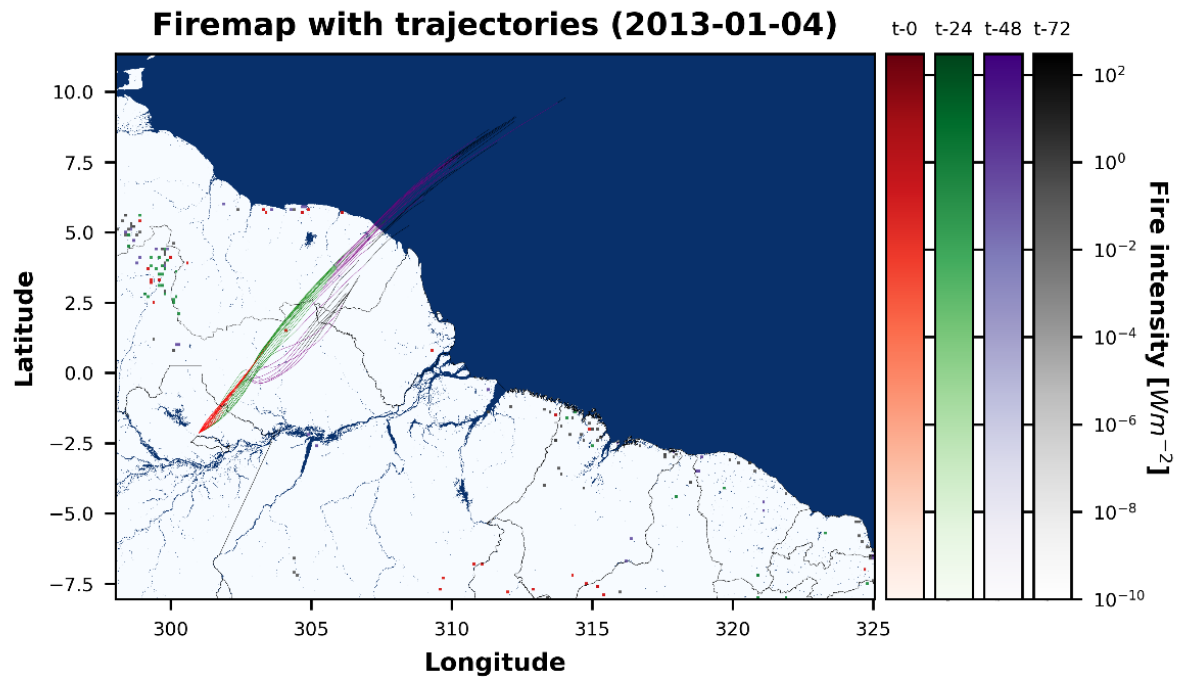

1  
 2 **Figure S1.** Ensemble of three-day HYSPLIT BTs, starting at every hour at the ATTO site (1000  
 3 m) on 04 January 2013 and corresponding daily fire intensity maps ( $W m^{-2}$ ) from the Global Fire  
 4 Assimilation System (GFAS).

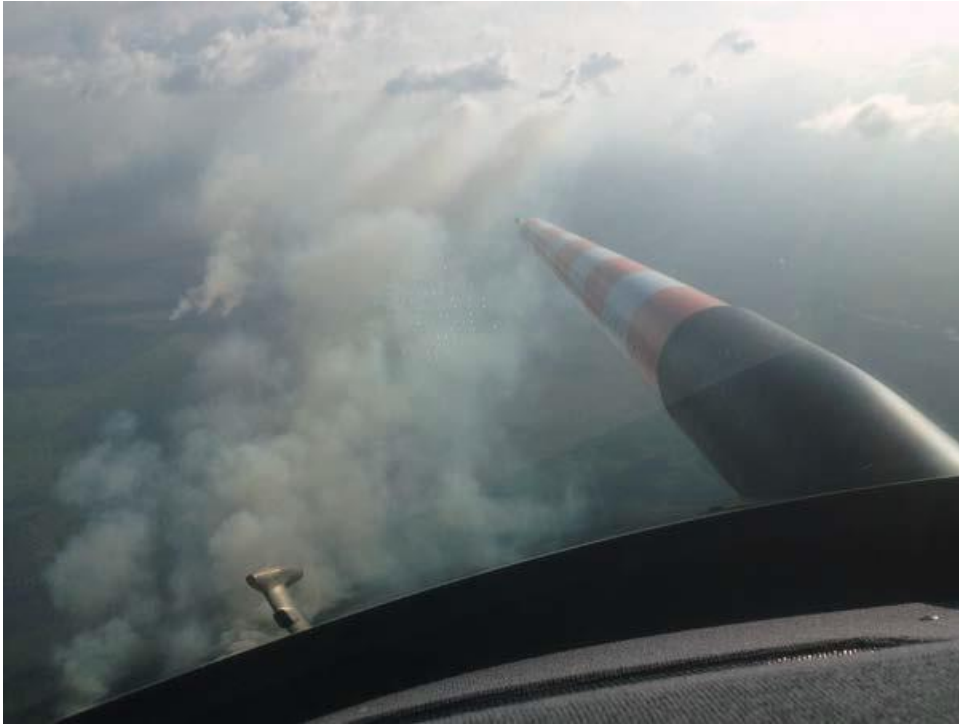

5  
6 **Figure S2.** View from the HALO cockpit, showing the active fire plumes (intersected at ~1 km  
7 above ground) during flight AC19 at 19:20 UTC on 30 September 2014. See also fire map in Fig.  
8 1.

82193 SBBE Belem (Aeroporto)

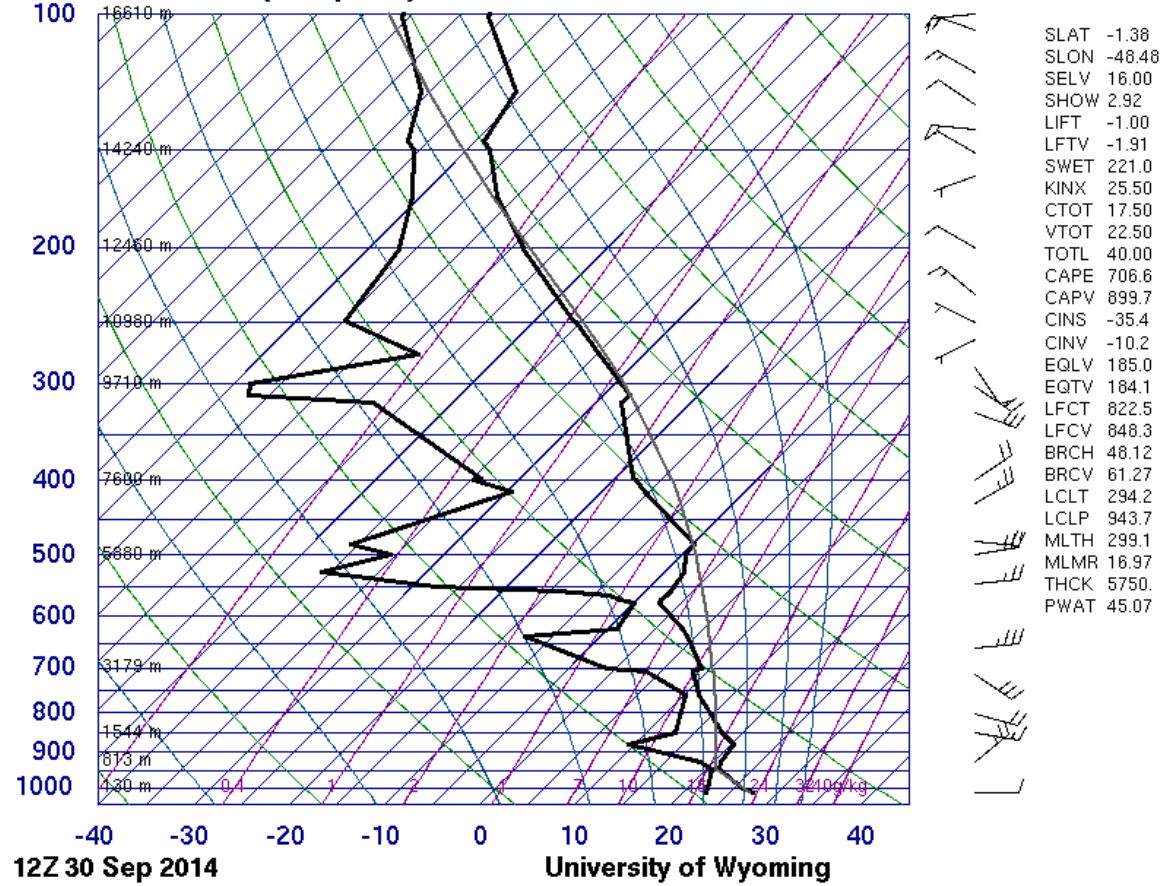

9  
10 **Figure S3.** Radiosonde soundings at Belem Airport (see Fig 1.) on 30 September 2014 at 12:00  
11 UTC, provided Wyoming University (<http://weather.uwyo.edu/upperair/sounding.html>, last access  
12 on 06 August 2019).

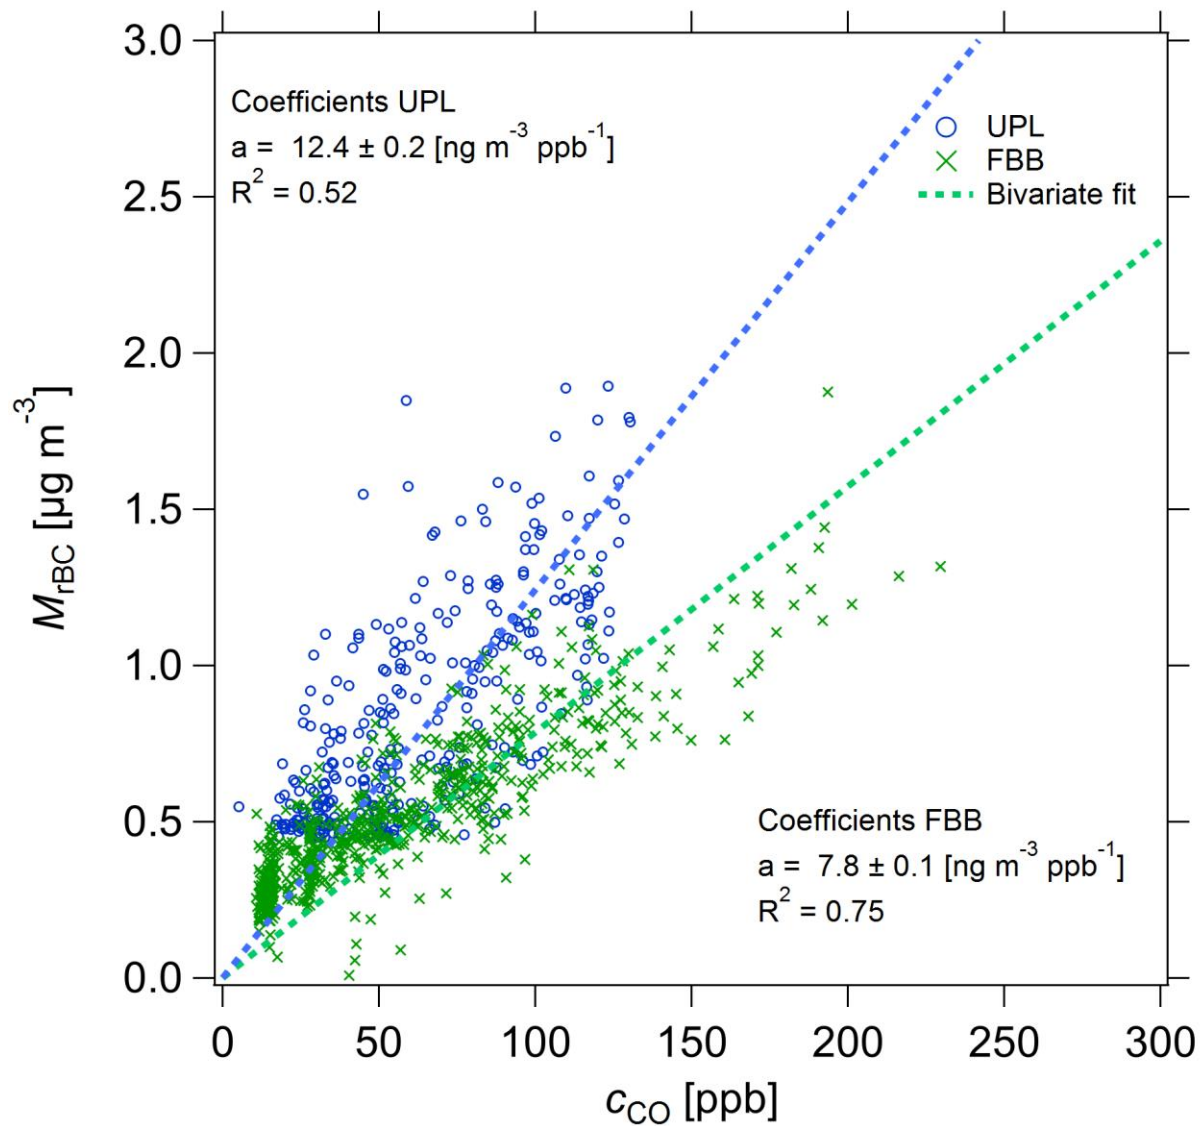

13  
 14 **Figure S4.** Correlation between  $\Delta c_{\text{CO}}$  and  $\Delta r_{\text{BC}}$  mass concentration within the upper pollution  
 15 layer (UPL) and fresh biomass burning emissions (FBB). A bivariate regression fit was applied to  
 16 the data set in order to obtain the BC enhancement ration,  $EnR_{\text{BC}}$ .

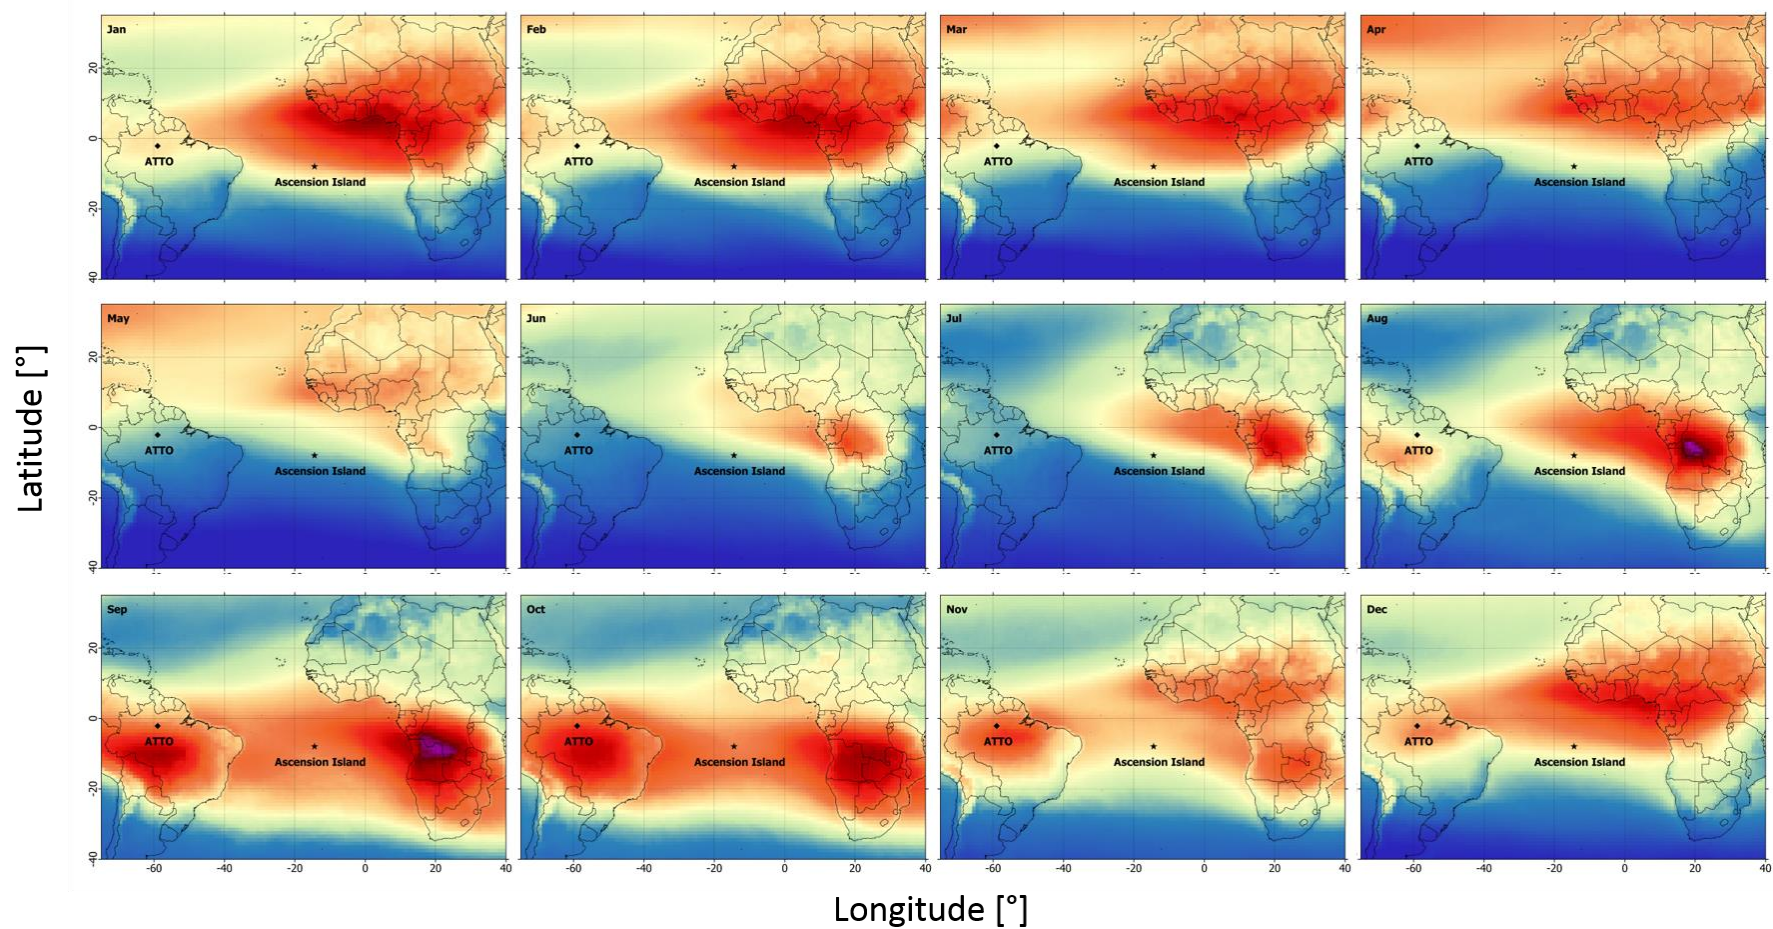

17

18 **Figure S5.** Monthly distribution of AIRS-derived carbon monoxide (400 to 600 hPa) over the Southern Hemisphere, relevant to the  
 19 Amazonian atmospheric conditions. The map shows averages over multiple years (2005-2018).

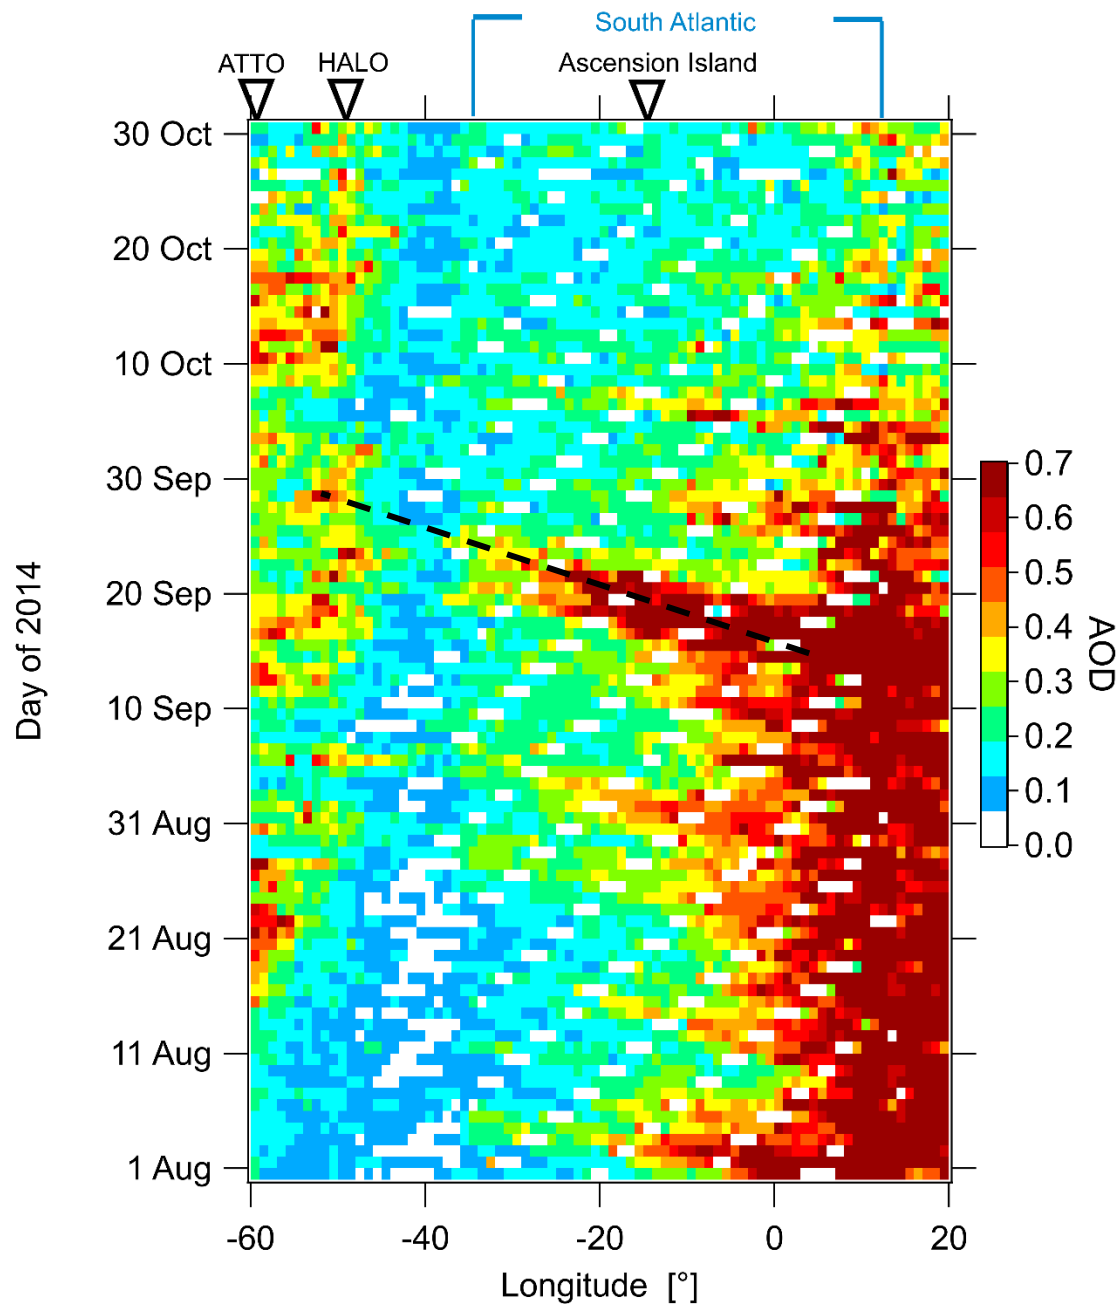

20  
 21 **Figure S6.** Hovmöller plot of the daily MODIS AOD (550 nm) distributed over the South  
 22 Atlantic region (60 °W to 20 °E) from August to October 2014, averaged over the latitudinal band  
 23 of 10° S to 5° N, corresponding to the region of interest (ROI) highlighted in Fig. 5a. Several  
 24 events of transatlantic transport of aerosol from Africa towards South America can be easily  
 25 identified, with the strongest plume starting approximately on 15 September 2014. A dashed line  
 26 for this particular event is also shown in the picture, which arrives at a time close to our  
 27 observations during AC19 on 30 September 2014. Westwards of 35 °W, the AOD levels are

28 increasingly influenced by the South American continent, which masks the AOD signals of the  
29 transported African pollution as it approaches the South American continent.



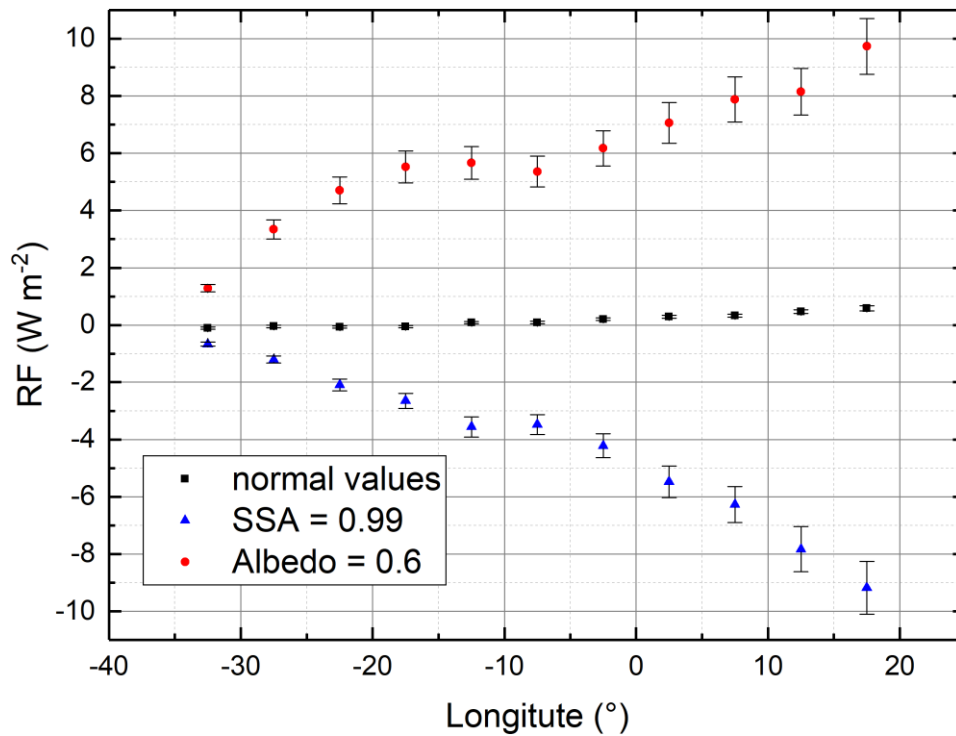

30  
 31 **Figure S7.** Sensitivity tests showing the DRF-TOA changes due to different assumptions in the  
 32 aerosol and surface properties, comparing with the original DRF-TOA estimation. The  
 33 simulations show that if the aerosol layer is mostly scattering (SSA = 0.99), a general cooling  
 34 (back-scattering by the layer) is observed. On the other hand, if the absorbing ocean is replaced  
 35 by a higher surface albedo (0.6), a warming effect by the layer is observed due to the downward  
 36 radiation that is scattered back and forth between the aerosol layer and the surface.
